# Supplementary material for: Topologically inferring pathway activity for precise survival outcome prediction: breast cancer as a case
Source: Royal Society of Chemistry journal article supplement (doi:10.1039/c6mb00757k), 2017-01-09
Supplement: c6mb00757k1.zip [file Supplemental_tables.xlsx]

## Sheet: Table S1
Table S1. Comparison of predictive performance of the six methods.
Methods	C-statistic			C-index
	GSE3494 (5-fold CV)	GSE3494→ GSE1456	GSE3494→ GSE45255	GSE3494 (5-fold CV)	GSE3494→ GSE1456	GSE3494→ GSE45255
DRWPSurv	0.7742±0.1203a	0.7486±0.0157	0.6295±0.0289	0.7035±0.0290	0.6822±0.0211	0.6626±0.0200
SPCA	0.7384±0.1317	0.7323±0.0155	0.6395±0.0245	0.6730±0.0260	0.6571±0.0214	0.6472±0.0209
Mean	0.6715±0.1742	0.7115±0.0296	0.5582±0.0293	0.6868±0.0491	0.5766±0.0354	0.5760±0.0393
Median	0.6348±0.1332	0.7021±0.0347	0.5620±0.0404	0.5800±0.0362	0.5646±0.0352	0.5649±0.0355
PAC	0.6349±0.1514	0.6663±0.0439	0.5520±0.0415	0.5670±0.0348	0.6619±0.0464	0.6583±0.0493
Genes	0.6728±0.1587	0.6574±0.0496	0.5530±0.0449	0.6395±0.0831	0.6218±0.0743	0.6190±0.0762
aShown are the average C-statistic (C-index) and the standard deviation. The C-statistic (C-index) shown in red is the best among the six methods.

## Sheet: Table S2
Table S2. The topological weights of genes in the Calcium signaling pathway.
Label	Gene	zscore	p-value1	-log(p-value)	p-value rank	Topological weight	Topological weight rank	Rank Change
CALM	CALM1	3.353	0.000799406	7.13164	1	0.00061973	1	―
PLCβ	PLCB1	3.2568	0.00112674	6.78842	2	0.000416326	2	―
PLCβ	PLCB3	3.02825	0.00245974	6.0077	7	0.000384728	3	↑
ADCY	ADCY3	-2.46982	0.0135182	4.30372	13	0.000360525	4	↑
TnC	TNNC1	3.1691	0.00152911	6.48307	6	0.000342333	5	↑
VDAC	VDAC1	3.17225	0.00151262	6.49391	5	0.000331196	6	↓
PTK	Erbb2	2.87307	0.00406501	5.50534	9	0.000314007	7	↑
VDAC	vdac2	3.25603	0.0011298	6.78571	4	0.000309655	8	↓
GPCR	PTGER3	-3.25636	0.00112852	6.78684	3	0.000301278	9	↓
ROC	GRIN2A	-2.44907	0.0143226	4.24592	14	0.000262734	10	↑
CaV1	Cacna1d	-2.95086	0.00316891	5.75437	8	0.000262214	11	↓
PDE1	pde1a	-2.74504	0.00605028	5.10765	11	0.000237649	12	↓
PMCA	ATP2B1	2.74944	0.00596969	5.12106	10	0.000236583	13	↓
ANT	SLC25A6	2.64911	0.00807035	4.81956	12	0.000230081	14	↓
PLCδ	Plcd1	-2.05636	0.0397477	3.2252	23	0.000225298	15	↑
GPCR	BDKRB2	2.19457	0.0281944	3.56863	19	0.000224507	16	↑
GPCR	Agtr1	-2.34683	0.0189338	3.96681	17	0.000207491	17	―
ANT	SLC25A5	2.44745	0.0143873	4.24141	15	0.000206682	18	↓
CaV3	CACNA1G	-2.40496	0.0161744	4.12432	16	0.000196242	19	↓
GPCR	EDNRA	-2.05693	0.0396931	3.22658	22	0.000177532	20	↑
GPCR	TRHR	2.20262	0.0276219	3.58915	18	0.00017186	21	↓
GPCR	Adora2b	-2.1168	0.0342768	3.37329	20	0.000157836	22	↓
CaV1	Cacna1f	-2.00495	0.0449687	3.10179	24	0.000154858	23	↑
GPCR	Adora2a	2.07779	0.0377289	3.27733	21	0.000153952	24	↓
GPCR	HRH2	1.99581	0.0459541	3.08011	25	0.00014597	25	―
1The p-values from the univariate Cox regression analysis of genes in the global pathway graph.
